# Supplementary material for: Vitamin D Supplementation Does Not Impact Resting Metabolic Rate, Body Composition and Strength in Vitamin D Sufficient Physically Active Adults
Source: Nutrients. 2020 Oct 12;12(10):3111. doi: 10.3390/nu12103111 (PMC7601703; doi:10.3390/nu12103111)
Supplement: Supplementary file 1 [file nutrients-12-03111-s001.pdf]

## Supplementary Material

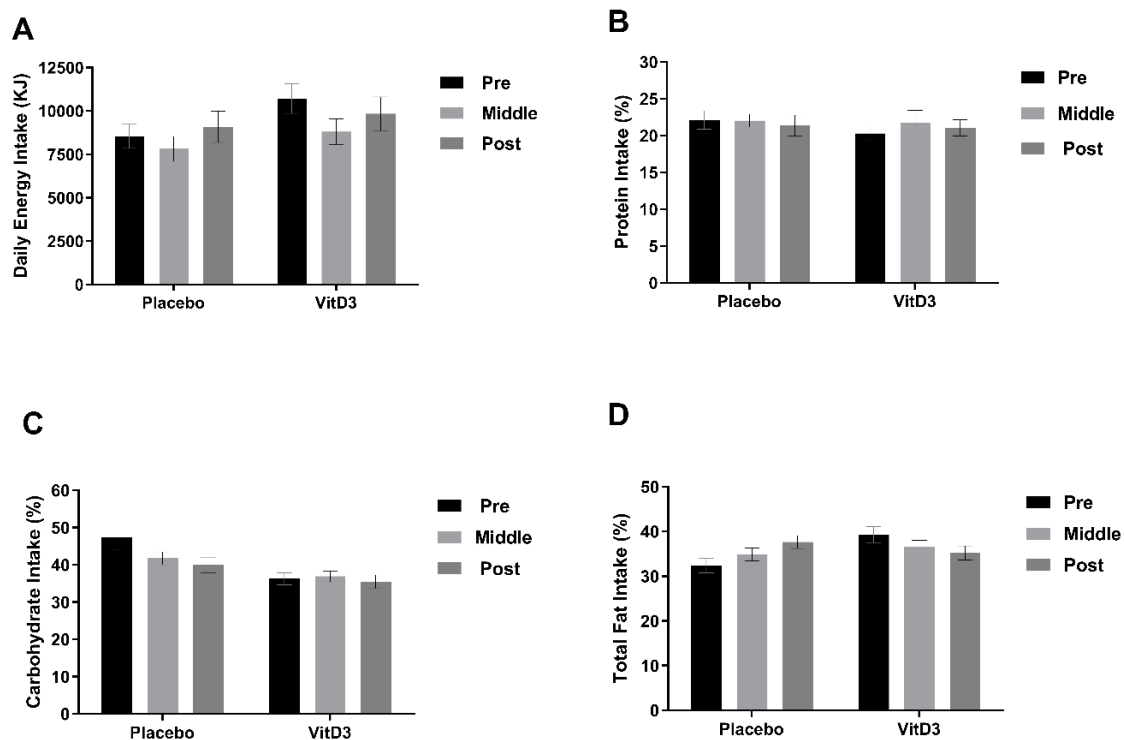

**Figure S1.** Mean ± (SD) Daily total energy (A) and macronutrient intake (B, C and D) pre-, mid- and post-supplementation in the placebo and VitD3 groups.

**Table S1.** Theoretical method to calculate the percentage of free 25(OH)D availability (example).

| Case | Total Serum VitD (nmol/L) | Classification by IOM [21] | Free VitD (pg/ml) | Free VitD (nmol/L) | Free VitD in Proportion to Total VitD | % of Free VitD | Serum Free VitD Recommendation: 0.03 - 0.4% [53] |
|------|---------------------------|----------------------------|-------------------|--------------------|---------------------------------------|----------------|--------------------------------------------------|
| 1    | 100                       | sufficient                 | 2                 | 0.01182            | $100 \times 0.01182 / 100$            | 0.01%          | Inadequate                                       |
| 2    | 40                        | deficient                  | 10                | 0.0591             | $100 \times 0.0591 / 40$              | 0.15%          | Adequate                                         |
